# Supplementary material for: Stability, toxicity and differential cellular uptake of protein passivated-Fe3O4 nanoparticles
Source: Royal Society of Chemistry journal article supplement (doi:10.1039/b901616c), 2009-01-01
Supplement: b901616c.pdf [file b901616c.pdf]

## Supporting Information

### Stability, Toxicity and Differential Cellular Uptake of Protein Passivated-Fe<sub>3</sub>O<sub>4</sub> Nanoparticles

*Avinash Bajaj,<sup>a</sup> Bappaditya Samanta,<sup>a</sup> Haoheng Yan,<sup>b</sup> D. Joseph Jerry,<sup>b</sup> Vincent M. Rotello<sup>a</sup>*

<sup>a</sup>*Department of Chemistry and* <sup>b</sup>*Veterinary and Animal Science, University of  
Massachusetts, Amherst, Massachusetts 01003, USA.*

Corresponding author: Prof. Vincent M Rotello, Email: rotello@chem.umass.edu

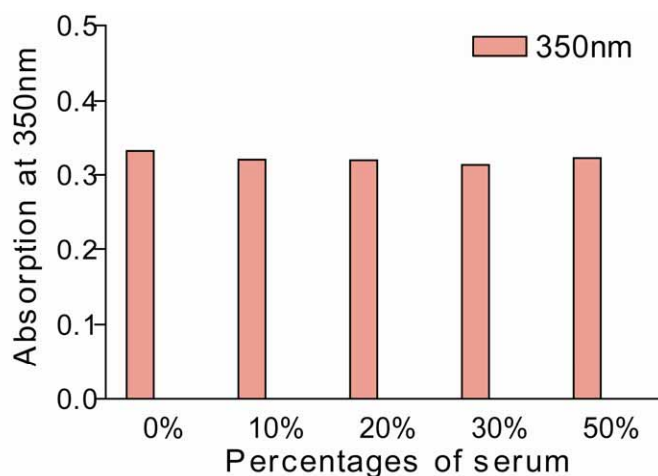

**Figure S-1.** Stability of the BSA coated Fe<sub>3</sub>O<sub>4</sub> nanoparticles at 6 h in the presence of different percentages of serum as evidenced from absorption graph at 350 nm. The BSA coated Fe<sub>3</sub>O<sub>4</sub> nanoparticles (4mg/mL) were dispersed in DMEM media supplemented with 0-50% of fetal bovine serum (FBS).

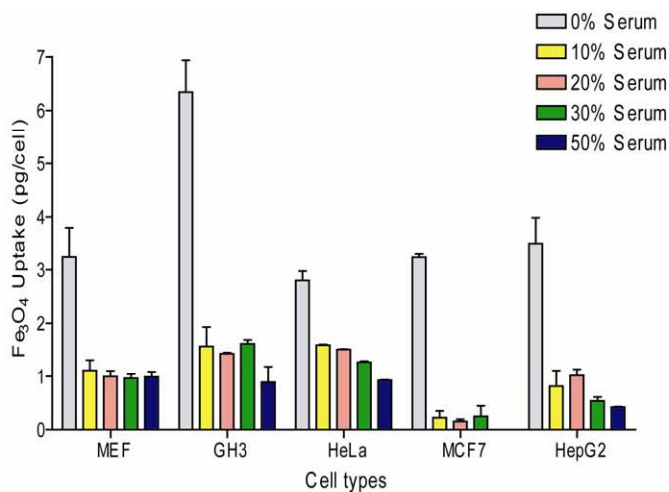

**Figure S2.** Uptake of the BSA-coated Fe<sub>3</sub>O<sub>4</sub> nanoparticles in different cell types in absence and presence of different percentages of serum. Cells ( $1 \times 10^6$ ) were incubated with BSA-coated Fe<sub>3</sub>O<sub>4</sub> nanoparticles (2mg/mL per well) for 6h. The particle uptake was quantified by Prussian blue assay.

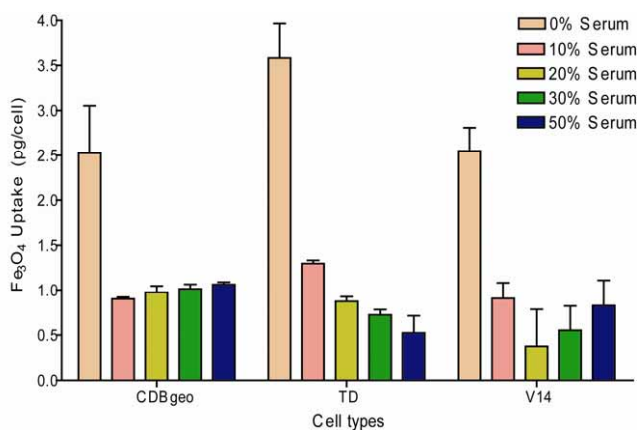

**Figure S3.** Uptake of the BSA-coated Fe<sub>3</sub>O<sub>4</sub> nanoparticles in different cell types in absence and presence of different percentages of serum. Cells ( $1 \times 10^6$ ) were incubated with BSA-coated Fe<sub>3</sub>O<sub>4</sub> nanoparticles (2mg/mL per well) for 6h. The particle uptake was quantified by Prussian blue assay.

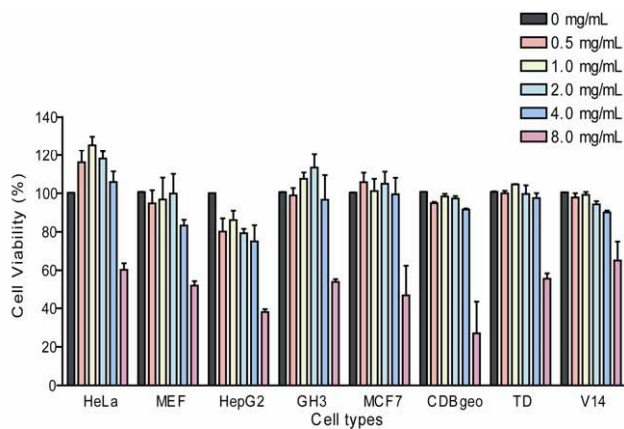

**Figure S-4.** Cell viabilities of BSA-coated Fe<sub>3</sub>O<sub>4</sub> nanoparticles in different cell types at various concentrations of nanoparticles. Cells (10, 000) were incubated with BSA-coated Fe<sub>3</sub>O<sub>4</sub> nanoparticles for 6h and cell viability was calculated by Alamar blue assay.
